# Supplementary material for: The influence of gender and ethnicity on facemasks and respiratory protective equipment fit: a systematic review and meta-analysis
Source: PubMed Central journal article supplement (PMC8587533; doi:10.1136/bmjgh-2021-005537), 2021-11-11
Supplement: bmjgh-2021-005537supp003.pdf [file bmjgh-2021-005537supp003.pdf]

**Appendix 3. Reason for exclusion of records at full-text review**

| <b>Studies</b>                                  | <b>Reason for exclusion</b>                                                                                                                                                                                                                                                                                                            |
|-------------------------------------------------|----------------------------------------------------------------------------------------------------------------------------------------------------------------------------------------------------------------------------------------------------------------------------------------------------------------------------------------|
| Cherrie et al. (2018) <sup>36</sup>             | <ul style="list-style-type: none"> <li>• Masks assessed also included cloth masks</li> <li>• Primary effectiveness testing did not involve fit-testing using human participants.</li> <li>• Only 2 of 5 filtering face-piece half masks were tested on participants</li> </ul>                                                         |
| Coffey et al. (2010) <sup>37</sup>              | <ul style="list-style-type: none"> <li>• Comparison of fit-testing methods to assess which test methods best identify poorly fitting respirators</li> </ul>                                                                                                                                                                            |
| Coffey et. (2004) <sup>38</sup>                 | <ul style="list-style-type: none"> <li>• Assessment of four performance measures were used to evaluate the fitting characteristics of 18 models rather than effect of anthropometrics/gender/race on fit-testing outcomes</li> </ul>                                                                                                   |
| Fakherpour et al. (2021) <sup>39</sup>          | <ul style="list-style-type: none"> <li>• Advanced publishing full text without figures for review of results</li> </ul>                                                                                                                                                                                                                |
| Han and Lee (2005) <sup>40</sup>                | <ul style="list-style-type: none"> <li>• Comparison of Inward Leakage and Total Inward Leakage testing</li> <li>• Some respirators used which do not meet the FFP3/N95 level of protection</li> </ul>                                                                                                                                  |
| Han et al. (2018) <sup>41</sup>                 | <ul style="list-style-type: none"> <li>• Assessment of a respirator modification, a tight-fitting net, to improve facial fit and respirator performance</li> <li>• Details of the filtering facepiece masks used not reported</li> <li>• No assessment of N95/FFP3 masks in the context of anthropometrics/gender/ethnicity</li> </ul> |
| Hui et al. (2017) <sup>42</sup>                 | <ul style="list-style-type: none"> <li>• Assessment of a novel mouldable filtering facemask performance as compared to standard respirators</li> <li>• No assessment of N95/FFP3 masks in the context of anthropometrics/gender/ethnicity</li> </ul>                                                                                   |
| Lawrence et al. (2006) <sup>43</sup>            | <ul style="list-style-type: none"> <li>• Comparison of elastomeric facepiece masks, filtering facepiece masks and surgical masks performance</li> <li>• No assessment of N95/FFP3 masks in the context of anthropometrics/gender/ethnicity</li> </ul>                                                                                  |
| Regli and Ungern-Sternberg (2020) <sup>44</sup> | <ul style="list-style-type: none"> <li>• Perspectives piece</li> <li>• No original research data</li> </ul>                                                                                                                                                                                                                            |
| Reponen et al. (2011) <sup>45</sup>             | <ul style="list-style-type: none"> <li>• Assessment of value of fit-testing and its effect on respirator protection</li> <li>• No assessment of N95/FFP3 mask performance in the context of anthropometrics/gender/ethnicity</li> </ul>                                                                                                |
| Sietsema and Brosseau (2018) <sup>46</sup>      | <ul style="list-style-type: none"> <li>• Studied whether quantitative fit factors are predictive of respirator fit during simulated activities</li> <li>• No assessment of N95/FFP3 mask performance in the context of anthropometrics/gender/ethnicity</li> </ul>                                                                     |
| Suen et al. (2020) <sup>47</sup>                | <ul style="list-style-type: none"> <li>• Comparison of mask fit and usability of two types of respirators in the context of nursing procedures</li> <li>• No assessment of N95/FFP3 mask performance in the context of anthropometrics/gender/ethnicity</li> </ul>                                                                     |
