# Supplementary material for: The influence of gender and ethnicity on facemasks and respiratory protective equipment fit: a systematic review and meta-analysis
Source: PubMed Central journal article supplement (PMC8587533; doi:10.1136/bmjgh-2021-005537), 2021-11-11
Supplement: bmjgh-2021-005537supp004.pdf [file bmjgh-2021-005537supp004.pdf]

## Appendix 4. Distribution of participants across gender and ethnic groups

| <i>Population characteristic</i> | <i>Participants</i>                   |       |                                         |       |                           |       |
|----------------------------------|---------------------------------------|-------|-----------------------------------------|-------|---------------------------|-------|
|                                  | <i>Mixed population studies (n=8)</i> |       | <i>Single population studies (n=16)</i> |       | <i>All studies (n=32)</i> |       |
| Total participants               | 6,068                                 |       | 2,477                                   |       | 10,658                    |       |
| Male                             | 1404                                  | (23%) | 1,414                                   | (57%) | 3,477                     | (33%) |
| Female                           | 4,163                                 | (69%) | 1063                                    | (43%) | 6,351                     | (60%) |
| Not reported                     | 501                                   | (8%)  | -                                       | -     | 830                       | (8%)  |
| White                            | 4,710                                 | (78%) | 399                                     | (16%) | 5,109                     | (48%) |
| African/Black                    | 456                                   | (8%)  | -                                       | -     | 456                       | (4%)  |
| Hispanic/Latino                  | 65                                    | (1%)  | 56                                      | (2%)  | 121                       | (1%)  |
| Asian                            | 390                                   | (6%)  | 1,639                                   | (66%) | 2,029                     | (19%) |
| South/Central Asian              | 177                                   | (3%)  | 383                                     | (15%) | 560                       | (5%)  |
| Aboriginal                       | 43                                    | (1%)  | -                                       | -     | 43                        | (<1%) |
| Mixed race/coloured              | 55                                    | (1%)  | -                                       | -     | 55                        | (1%)  |
| Other                            | 55                                    | (1%)  | -                                       | -     | 55                        | (1%)  |
| not reported                     | 71                                    | (2%)  | -                                       | -     | 2,230                     | (21%) |
