# Supplementary material for: The influence of gender and ethnicity on facemasks and respiratory protective equipment fit: a systematic review and meta-analysis
Source: HighWire-hosted journal article supplement (doi:10.1136/bmjgh-2021-005537), 2021-11-01

**Appendix 5.**

**Bictorbitale breadth**

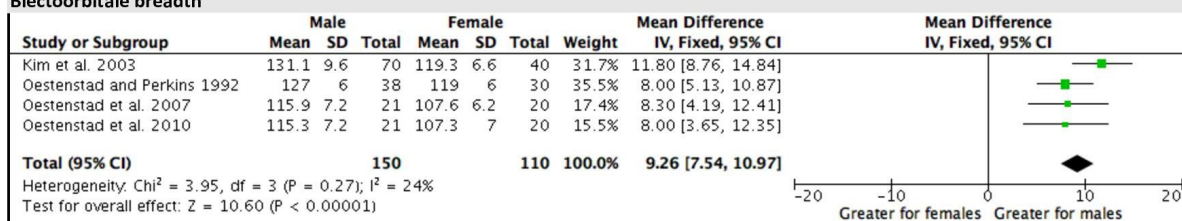

**Bizygomatic breadth [Face width]**

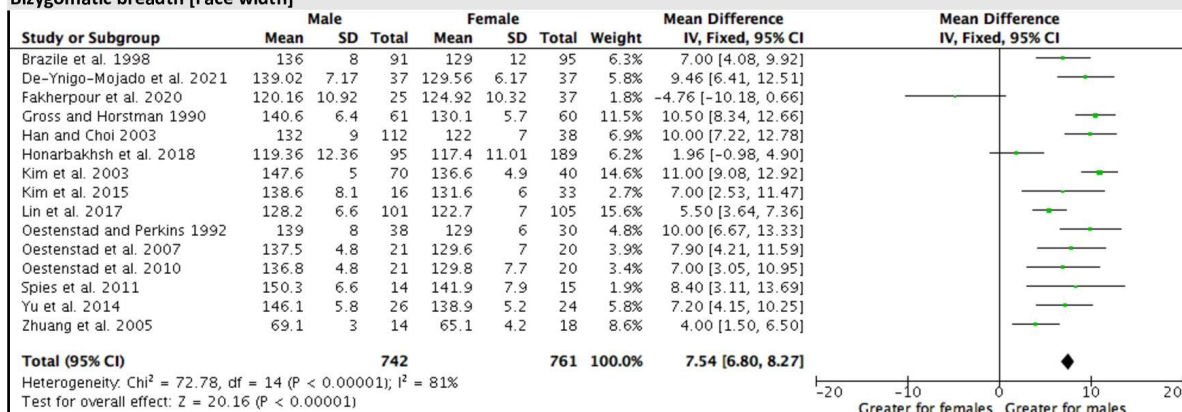

Supplement: bmjgh-2021-005537supp005_data_supplement.pdf [file bmjgh-2021-005537supp005_data_supplement.pdf]
