# Supplementary material for: The influence of gender and ethnicity on facemasks and respiratory protective equipment fit: a systematic review and meta-analysis
Source: HighWire-hosted journal article supplement (doi:10.1136/bmjgh-2021-005537), 2021-11-01
Supplement: bmjgh-2021-005537supp006_data_supplement.pdf [file bmjgh-2021-005537supp006_data_supplement.pdf]

Appendix 6. Association of variables facial dimensions, gender and ethnicity with RPE fit

| Studies                                           | Pass rates (PR) Users/RPE groups*                       | Association between facial dimensions (FD) and fit**                                                                                                                  | Association between gender and fit**                                                                                     | Association between ethnicity and fit**         | Association of mask factors***                      | Recommendations or conclusions made by authors                                            |
|---------------------------------------------------|---------------------------------------------------------|-----------------------------------------------------------------------------------------------------------------------------------------------------------------------|--------------------------------------------------------------------------------------------------------------------------|-------------------------------------------------|-----------------------------------------------------|-------------------------------------------------------------------------------------------|
| Liau et al. (1982) <sup>48</sup><br>US            | N/A                                                     | low correlation coefficients but greatest for FW and LW                                                                                                               | N/A                                                                                                                      | N/A                                             | N/A                                                 | No FD recommendation                                                                      |
| Gross and Horstman (1990) <sup>49</sup><br>US     | Users: 95%<br>♂: 83-85%<br>♀: 71-89%<br>(RPE dependent) | Nose and lip measurements were relevant but no significant correlation                                                                                                | PR for 2/3 RPE models: ♂ > ♀<br>Comparable PR between genders with >1 RPE models                                         | N/A                                             | variability of FF based on brand for ♀              | No FD recommendation. Need to offer variety in RPE model and size.                        |
| Oestenstad et al. (1990) <sup>50</sup><br>US      | N/A                                                     | High prevalence of nose leaks. Significant correlation for NRB, BIOC, LFL to FF.                                                                                      | Association of facial dimension and leak sites attributed to gender. Greater predictability with gender specific models. | N/A                                             | N/A                                                 | Consideration for inclusion of nasal dimensions                                           |
| Oestenstad and Perkins (1992) <sup>27</sup><br>US | Users: 80.9%                                            | FDs predict fit. LFL alone is a good predictor. FL and NRB are also relevant                                                                                          | Gender based differences in fit predicted by differences in FD. Greater predictability with race/gender specific models  | Race specific models improve predictive ability | N/A                                                 | Other FDs (i.e. LFL) may be more appropriate                                              |
| Brazile et al. (1998) <sup>51</sup><br>US         | Users: 91.9%<br>♂: 91.2%<br>♀: 92.6%                    | NW and NP were associated with FF but account for small percentage of FF variation and were not good predictors of fit                                                | No significant association<br>Comparable FF and PR between genders                                                       | Black ♀ : lowest PR<br>No effect on FF          | N/A                                                 | Fit is associated with individual FD rather than FD associated with gender or ethnicity   |
| Han (2000) <sup>52</sup><br>South Korea           | RPE groups: 30.9 - 77.2%                                | Significant FF variation between facial size categories                                                                                                               | Difference in FF scores: ♂ > ♀                                                                                           | Low/moderate PR amongst Korean users ‡          | Significant difference in FF and PR between brands  | Respirators designed for males may not fit females. FL and LW alone are not good criteria |
| Han and Choi (2003) <sup>29</sup><br>South Korea  | ♂: 58 - 78.6%<br>♀: 34.2 - 50%<br>(RPE dependent)       | FW, NP and BTMA arc are good predictors of fit. No common FD variable across all RPE/gender subgroups                                                                 | Difference in PR for 2/3 RPE models: ♂ > ♀<br>Gender-specific models account for most variation in fit factor            | Low/moderate PR amongst Korean users ‡          | Significance difference in FF and PR between brands | The 3 FD predictive of fit should be considered in designing RPE for Koreans              |
| Kim et al. (2003) <sup>53</sup><br>South Korea    | ♂: 41.4 - 87%<br>♀: 10.3 - 60%<br>(RPE dependent)       | ♂: No correlation for FD and FF<br>♀: 5 FD correlate with FF (BTSA, BECTO, BTMA, JW, LFL)<br>FW, LFL, BIOC, BECTO, NL, LW, BTSA predict PR/fit (gender/RPE dependent) | Difference in FF and PR: ♂ > ♀<br>Greater predictability with gender specific models                                     | Low/moderate PR amongst Korean users ‡          | Significance difference in FF and PR between brands | Consideration of alternative FD in design of quarter mask respirators for Koreans         |
| Zhuang et al. (2005) <sup>54</sup>                | N/A                                                     | 16/33 models of RPE model/size combinations show association of                                                                                                       | Comparable FF between genders for 16/18 RPE models                                                                       | N/A                                             | FF associated with number of sizes per              | FL and FW are recommended for defining the panel                                          |
